# Supplementary material
Source: Research Square preprint supplement (doi:10.21203/rs.3.rs-9420466/v1)
Supplement: Supplementary file 2 [file 9b8c16319f42d4bc70c94745.pdf]

# 1 Supplementary Results

## 2 Supplementary Table 1: List of included studies in the systematic review.

| PMID     | Authors               | Journal                     | Year | Title                                                                                                                                                                                        |      |
|----------|-----------------------|-----------------------------|------|----------------------------------------------------------------------------------------------------------------------------------------------------------------------------------------------|------|
| 35943274 | Jin X et al.          | Microbiol Spectr            | 2022 | Improving Suspected Pulmonary Infection Diagnosis by Bronchoalveolar Lavage Fluid Metagenomic Next-Generation Sequencing: a Multicenter Retrospective Study                                  | [1]  |
| 33858378 | Xie F et al.          | BMC Infect Dis              | 2021 | Clinical metagenomics assessments improve diagnosis and outcomes in community-acquired pneumonia                                                                                             | [2]  |
| 36710980 | Liu Y et al.          | Front Cell Infect Microbiol | 2023 | Metagenomics next-generation sequencing provides insights into the causative pathogens from critically ill patients with pneumonia and improves treatment strategies                         | [3]  |
| 34784976 | Charalampous T et al. | Genome Med                  | 2021 | Evaluating the potential for respiratory metagenomics to improve treatment of secondary infection and detection of nosocomial transmission on expanded COVID-19 intensive care units         | [4]  |
| 32821543 | Zhang P et al.        | PeerJ                       | 2020 | Metagenomic next-generation sequencing for the clinical diagnosis and prognosis of acute respiratory distress syndrome caused by severe pneumonia: a retrospective study                     | [5]  |
| 35071027 | Yang F et al.         | Front Cell Infect Microbiol | 2022 | Clinical Symptoms and Outcomes of Severe Pneumonia Caused by Chlamydia psittaci in Southwest China                                                                                           | [6]  |
| 35816485 | Li X et al.           | PLoS One                    | 2022 | Clinical, radiological and pathological characteristics of moderate to fulminant psittacosis pneumonia                                                                                       | [7]  |
| 37580698 | Tang X et al.         | BMC Infect Dis              | 2023 | Psittacosis caused severe community-acquired pneumonia accompanied by acute hypoxic respiratory failure: a multicenter retrospective cohort study from China                                 | [8]  |
| 34603275 | Zhan Y et al.         | Front Microbiol             | 2021 | Clinical Evaluation of a Metagenomics-Based Assay for Pneumonia Management                                                                                                                   | [9]  |
| 36409152 | Chen L et al.         | Microbiol Spectr            | 2022 | Metagenomic Next-Generation Sequencing for the Diagnosis of Neonatal Infectious Diseases                                                                                                     | [10] |
| 35842216 | Yin Q et al.          | Int J Infect Dis            | 2022 | Atypical pneumonia caused by Chlamydia psittaci during the COVID-19 pandemic                                                                                                                 | [11] |
| 38145053 | Hao J et al.          | Front Cell Infect Microbiol | 2023 | Clinical utility of metagenomic next-generation sequencing in pathogen detection for lower respiratory tract infections and impact on clinical outcomes in southernmost China                | [12] |
| 38264726 | Wang JZ et al.        | Front Cell Infect Microbiol | 2024 | Etiology of lower respiratory tract in pneumonia based on metagenomic next-generation sequencing: a retrospective study                                                                      | [13] |
| 35908723 | Liang M et al.        | Int J Infect Dis            | 2022 | Metagenomic next-generation sequencing for accurate diagnosis and management of lower respiratory tract infections                                                                           | [14] |
| 35724965 | Li H et al.           | Clin Respir J               | 2022 | Metagenomic next-generation sequencing for the diagnosis of Chlamydia psittaci pneumonia                                                                                                     | [15] |
| 37871727 | Zhao H et al.         | J Microbiol Methods         | 2023 | Metagenomic next-generation sequencing of bronchoalveolar lavage fluid in non-severe and severe pneumonia patients                                                                           | [16] |
| 35622934 | Li N et al.           | J Clin Lab Anal             | 2022 | Clinical application of metagenomic next-generation sequencing technology in the diagnosis and treatment of pulmonary infection pathogens: A prospective single-center study of 138 patients | [17] |
| 35847093 | Zhao D et al.         | Front Microbiol             | 2022 | Diagnostic Value and Clinical Application of mNGS for Post-Liver Transplantation Infection: A Cross-Sectional Study With Case Reports                                                        | [18] |
| 38368306 | Lv T et al.           | Infection                   | 2024 | Utilizing metagenomic next-generation sequencing for pathogen detection and diagnosis in lower respiratory tract infections in real-world clinical practice                                  | [19] |

|          |                       |                                 |      |                                                                                                                                                                                                 |      |
|----------|-----------------------|---------------------------------|------|-------------------------------------------------------------------------------------------------------------------------------------------------------------------------------------------------|------|
| 38997717 | Zhang Z et al.        | BMC Pulm Med                    | 2024 | Metagenomic next-generation sequencing promotes diagnosis and treatment of <i>Pneumocystis jirovecii</i> pneumonia in non-HIV infected children: a retrospective study                          | [20] |
| 36211959 | Zhang B et al.        | Front Cell Infect Microbiol     | 2022 | Comparing the application of mNGS after combined pneumonia in hematologic patients receiving hematopoietic stem cell transplantation and chemotherapy: A retrospective analysis                 | [21] |
| 32879643 | Chen X et al.         | Can J Infect Dis Med Microbiol  | 2020 | Blood and Bronchoalveolar Lavage Fluid Metagenomic Next-Generation Sequencing in Pneumonia                                                                                                      | [22] |
| 35979088 | Bao S et al.          | Front Cell Infect Microbiol     | 2022 | Metagenomic next-generation sequencing for the diagnosis of pulmonary aspergillosis in non-neutropenic patients: a retrospective study                                                          | [23] |
| 37457591 | Deng Z et al.         | Front Med (Lausanne)            | 2023 | BALF metagenomic next-generation sequencing analysis in hematological malignancy patients with suspected pulmonary infection: clinical significance of negative results                         | [24] |
| 35837477 | Wang D et al.         | Front Cell Infect Microbiol     | 2022 | Metagenomic Next-Generation Sequencing Successfully Detects Pulmonary Infectious Pathogens in Children With Hematologic Malignancy                                                              | [25] |
| 36277011 | Wang L et al.         | Comput Math Methods Med         | 2022 | The Value of Macrogene Second-Generation Sequencing in the Diagnosis, Guidance of Drug Use, and Efficacy Monitoring of Infectious Pneumonia in Premature Infants                                | [26] |
| 34790588 | Zhao Z et al.         | Front Cell Infect Microbiol     | 2021 | Prevalence of Fungal and Bacterial Co-Infection in Pulmonary Fungal Infections: A Metagenomic Next Generation Sequencing-Based Study                                                            | [27] |
| 34197923 | Zhou H et al.         | J Mol Diagn                     | 2021 | Clinical Impact of Metagenomic Next-Generation Sequencing of Bronchoalveolar Lavage in the Diagnosis and Management of Pneumonia: A Multicenter Prospective Observational Study                 | [28] |
| 36034706 | Zhao YC et al.        | Front Cell Infect Microbiol     | 2022 | Role and Clinical Application of Metagenomic Next-Generation Sequencing in Immunocompromised Patients With Acute Respiratory Failure During Veno-Venous Extracorporeal Membrane Oxygenation     | [29] |
| 38914949 | Liu M et al.          | BMC Infect Dis                  | 2024 | The etiological diagnostic value of metagenomic next-generation sequencing in suspected community-acquired pneumonia                                                                            | [30] |
| 37506257 | Yan M et al.          | J Infect Dis                    | 2024 | Impact of Metagenomic Next-Generation Sequencing of Bronchoalveolar Lavage Fluid on Antimicrobial Stewardship in Patients With Lower Respiratory Tract Infections: A Retrospective Cohort Study | [31] |
| 38561853 | Chen H et al.         | Eur J Med Res                   | 2024 | Assessment and clinical utility of metagenomic next-generation sequencing for suspected lower respiratory tract infections                                                                      | [32] |
| 39067508 | Wu X et al.           | Chest                           | 2024 | Effect of Metagenomic Next-Generation Sequencing on Clinical Outcomes of Patients With Severe Community-Acquired Pneumonia in the ICU: A Multicenter, Randomized Controlled Trial               | [33] |
| 35783441 | Wang D et al.         | Front Microbiol                 | 2022 | Metagenomic Next-Generation Sequencing Is Highly Efficient in Diagnosing <i>Pneumocystis jirovecii</i> Pneumonia in the Immunocompromised Patients                                              | [34] |
| 34141628 | Sun T et al.          | Front Cell Infect Microbiol     | 2021 | Metagenomic Next-Generation Sequencing for Pathogenic Diagnosis and Antibiotic Management of Severe Community-Acquired Pneumonia in Immunocompromised Adults                                    | [35] |
| 37900317 | Li XX et al.          | Front Cell Infect Microbiol     | 2023 | Clinical application of metagenomic next-generation sequencing in non-immunocompromised patients with severe pneumonia supported by veno-venous extracorporeal membrane oxygenation             | [36] |
| 31813078 | Li Y et al.           | Eur J Clin Microbiol Infect Dis | 2020 | Application of metagenomic next-generation sequencing for bronchoalveolar lavage diagnostics in critically ill patients                                                                         | [37] |
| 36590589 | Li S et al.           | Front Cell Infect Microbiol     | 2022 | The clinical significance of in-house metagenomic next-generation sequencing for bronchoalveolar lavage fluid diagnostics in patients with lower respiratory tract infections                   | [38] |
| 39210307 | Zheng Y et al.        | BMC Pulm Med                    | 2024 | Clinical utility of metagenomic next-generation sequencing on bronchoalveolar lavage fluid in diagnosis of lower respiratory tract infections                                                   | [39] |
| 37938162 | Charalampous T et al. | Am J Respir Crit Care Med       | 2024 | Routine Metagenomics Service for ICU Patients with Respiratory Infection                                                                                                                        | [40] |

|          |                |                                            |      |                                                                                                                                                                                                                     |      |
|----------|----------------|--------------------------------------------|------|---------------------------------------------------------------------------------------------------------------------------------------------------------------------------------------------------------------------|------|
| 37663088 | Zhang H et al. | Open Forum Infect Dis                      | 2023 | The Utility of Metagenomic Next-Generation Sequencing (mNGS) in the Management of Patients With Bronchiectasis: A Single-Center Retrospective Study of 93 Cases                                                     | [41] |
| 36389134 | Ma W et al.    | Front Cell Infect Microbiol                | 2022 | Negative results of bronchoalveolar lavage fluid metagenomic next-generation sequencing in critically ill patients                                                                                                  | [42] |
| 38455752 | Chen XH et al. | Transl Pediatr                             | 2024 | Application value of metagenomics next-generation sequencing in the diagnosis of respiratory virus infection after congenital heart surgery                                                                         | [43] |
| 38993672 | Jing C et al.  | iScience                                   | 2024 | Optimizing treatment administration strategies using negative mNGS results in corticosteroid-sensitive diffuse parenchymal lung diseases                                                                            | [44] |
| 35221789 | Ju CR et al.   | Transpl Int                                | 2022 | Metagenomic Next-Generation Sequencing for Diagnosing Infections in Lung Transplant Recipients: A Retrospective Study                                                                                               | [45] |
| 37272100 | Luo W et al.   | Discov Med                                 | 2023 | Comparison of Third-Generation Sequencing Technology and Traditional Microbiological Detection in Pathogen Diagnosis of Lower Respiratory Tract Infection                                                           | [46] |
| 38351916 | Yao A et al.   | Front Microbiol                            | 2024 | Higher diagnostic value of metagenomic next-generation sequencing in acute infection than chronic infection: a multicenter retrospective study                                                                      | [47] |
| 36743335 | Dong Y et al.  | Infect Drug Resist                         | 2023 | Advancing Microbe Detection for Lower Respiratory Tract Infection Diagnosis and Management with Metagenomic Next-Generation Sequencing                                                                              | [48] |
| 37529954 | Zhong S et al. | Chinese Journal of Contemporary Pediatrics | 2023 | [Value of metagenomic next-generation sequencing in children with hematological malignancies complicated with infections]                                                                                           | [49] |
| 36124109 | Fu Y et al.    | Infect Drug Resist                         | 2022 | Metagenomic Next-Generation Sequencing in the Diagnosis of Infectious Fever During Myelosuppression Among Pediatric Patients with Hematological and Neoplastic Diseases                                             | [50] |
| 38112143 | Feng RG et al. | Zhongguo Dang Dai Er Ke Za Zhi             | 2023 | [Application of metagenomic next-generation sequencing of bronchoalveolar lavage fluid in the diagnosis and treatment of refractory pneumonia in children]                                                          | [51] |
| 39045107 | Luo W et al.   | Infect Drug Resist                         | 2024 | Metagenomic Next-Generation Sequencing for Accurate Diagnosis of Pneumocystis jirovecii Pneumonia: A Comparative Study with Traditional Methods                                                                     | [52] |
| 37408612 | Sun H et al.   | Front Cell Infect Microbiol                | 2023 | Combination of transbronchial cryobiopsy based clinic-radiologic-pathologic strategy and metagenomic next-generation sequencing for differential diagnosis of rapidly progressive diffuse parenchymal lung diseases | [53] |

3

4

5

## 6 Supplementary Table 2: Candidate consensus statements and the results from Delphi round one and two.

| Statement                                                                                                                                                                                                      | Agreement % | Median Likert (1–5) | IQ R | Result |
|----------------------------------------------------------------------------------------------------------------------------------------------------------------------------------------------------------------|-------------|---------------------|------|--------|
| ROUND 1                                                                                                                                                                                                        |             |                     |      |        |
| Q1 Thresholds for reporting detections of micro-organisms should be based on evidence from validation studies against standard-of-care diagnostics.                                                            | 90          | 4                   | 1    | Accept |
| Q2 Obligate pathogens (e.g. <i>Mycobacterium tuberculosis</i> ) should be reported whenever detected, regardless of abundance.                                                                                 | 84          | 5                   | 1    | Accept |
| Q3 Metagenomic detections of organisms below pre-specified thresholds should not be reported.                                                                                                                  | 63          | 4                   | 1    | Reject |
| Q4 Organisms present in negative controls and patient samples at comparable levels should not be reported.                                                                                                     | 90          | 5                   | 1    | Accept |
| Q5 Detections of organisms on a predefined respiratory-pathogen list that meet reporting thresholds should be reported directly, whereas detections of others should undergo additional clinical adjudication. | 63          | 4                   | 1    | Reject |
| Q6 Reporting decisions may rely on expert clinical adjudication rather than fixed numeric thresholds, particularly where quantitative validation is unfeasible (e.g. rare organisms).                          | 95          | 4                   | 1    | Accept |
| Q7 Reports may summarise mixed oral flora collectively rather than listing each species.                                                                                                                       | 100         | 5                   | 1    | Accept |
| Q8 Detections of potential pathogens (e.g. <i>S. pneumoniae</i> , <i>H. influenzae</i> , <i>S. dysgalactiae</i> ) above threshold but amongst oral flora should be available to the validating clinician.      | 90          | 5                   | 1    | Accept |
| Q9 The clinician validating results should consider specimen type, relative abundance, and clinical context before deciding whether to report potential pathogens amongst oral flora.                          | 95          | 5                   | 0.5  | Accept |
| Q10 <i>Streptococcus pyogenes</i> should always be reported when detected in respiratory samples.                                                                                                              | 95          | 4                   | 0.5  | Accept |
| Q11 <i>Candida</i> sp. detected in respiratory samples should be reported when found above threshold.                                                                                                          | 47          | 3.5                 | 1    | Reject |
| Q12 Detections of <i>Tropheryma whipplei</i> may be suppressed or considered part of oral flora.                                                                                                               | 47          | 4                   | 1    | Reject |
| Q13 Detections of pathogens with infection-control / public-health importance (e.g. <i>M. tuberculosis</i> , <i>Legionella</i> ) above threshold should be notified to infection control and/or public health. | 90          | 5                   | 1    | Accept |
| Q14 When detected in sputum samples, anaerobes should be reported as oral flora or commensals.                                                                                                                 | 53          | 4                   | 1    | Reject |
| Q15 Where a mixture of anaerobes with non-anaerobic commensal bacteria is present, this could be reported as “oral flora including anaerobes.”                                                                 | 84          | 4                   | 1    | Accept |
| Q16 When only anaerobes are detected, “Anaerobes detected” may be reported.                                                                                                                                    | 84          | 4                   | 1    | Accept |
| Q17 Species of anaerobes detected in pleural fluids should be named at the genus or species level.                                                                                                             | 74          | 4                   | 1    | Accept |
| Q18 Detections of herpesviruses should be assessed by the clinician validating results.                                                                                                                        | 95          | 4                   | 1    | Accept |
| Q19 Detections should be interpreted with consideration of the patient’s immune status and clinical context.                                                                                                   | 90          | 5                   | 1    | Accept |

|                                                                                                                                                                                                                            |       |     |     |        |
|----------------------------------------------------------------------------------------------------------------------------------------------------------------------------------------------------------------------------|-------|-----|-----|--------|
| Q20 Detections judged to be reactivations can be suppressed and not released to clinicians outside the infection team.                                                                                                     | 58    | 4   | 2   | Reject |
| Q21 Special populations (e.g. allogeneic HSCT recipients and neonates) may require different reporting rules compared to the general ICU population.                                                                       | 79    | 4   | 1   | Accept |
| Q22 Where clinical significance is suspected, the diagnosis should always be confirmed with additional testing (e.g. viral load, serology, cytopathology).                                                                 | 79    | 4   | 1   | Accept |
| Q23 Where herpesviruses are reported, an interpretative comment should be added (e.g. "Detection of herpesviruses is common in critically unwell patients and likely reflects reactivation; please correlate clinically"). | 95    | 4   | 1   | Accept |
| Q24 Detections of <i>Pneumocystis jirovecii</i> above threshold should be reported in lower respiratory-tract samples.                                                                                                     | 90    | 5   | 1   | Accept |
| Q25 Detections of <i>Pneumocystis jirovecii</i> above threshold should be reported in all respiratory sample types.                                                                                                        | 58    | 4   | 1   | Reject |
| Q26 Reporting of <i>Pneumocystis jirovecii</i> should be accompanied by an interpretative comment noting potential colonisation.                                                                                           | 95    | 4   | 1   | Accept |
| Q27 Genotypic predictions of antimicrobial resistance may be reported if they have been formally validated.                                                                                                                | 100   | 4   | 1   | Accept |
| ROUND 2                                                                                                                                                                                                                    |       |     |     |        |
| Q1 Tropheryma whipplei should be assessed at clinical validation and if judged to be clinically insignificant, it may be suppressed or considered part of oral flora                                                       | 100 % | 4.0 | 0.0 | Accept |
| Q2 Detections of PJP in upper respiratory tract samples should be assessed at clinical validation and may be reported if considered potentially clinically significant.                                                    | 100%  | 4.0 | 0.0 | Accept |
| Q3 When anaerobes are predominant amongst oral flora, they may be reported as oral flora with predominant anaerobes                                                                                                        | 93%   | 4   | 0.0 | Accept |
| Q4 Detections of organisms on a pre-defined respiratory pathogen list that meet reporting thresholds should be reported directly, whereas detections of other pathogens should be assessed further at clinical validation. | 93%   | 4   | 0.0 | Accept |
| Q5 Noting that thresholds may differ for obligate and opportunistic pathogens, detections of organisms below the pre-specified thresholds should not be reported.                                                          | 86%   | 4   | 0.0 | Accept |
| Q6 Candida sp. detected in respiratory samples should be reported when found above threshold in respiratory samples                                                                                                        | 79%   | 4   | 0.0 | Accept |
| Q7 Detections of herpesviruses can be suppressed and not released to clinicians outside the infection team if judged to be reactivation at clinical validation.                                                            | 36%   | 3   | 2.0 | Reject |
| ROUND 3                                                                                                                                                                                                                    |       |     |     |        |
| Q1 Herpesviruses can be suppressed and not released to clinicians outside the infection team if judged to be non-significant at clinical validation'                                                                       | 80%   | 4   | 1.0 | Accept |

## 9 Risk of bias and applicability

10 No study was judged to be at low risk of bias across all four domains, and only 2/53 studies had three  
11 domains at low risk (Supplementary Figure 1).

12 For patient selection, only 6/53 (11%) studies were at low risk of bias, whereas 41/53 (77%) were judged  
13 high risk and 6/53 (11%) unclear. Consecutive or random enrolment was explicitly reported in just 6/53  
14 (11%) studies, with most either clearly non-consecutive (8/53, 15%) or not described (39/53, 74%). About  
15 half of studies (27/53, 51%) were judged to have inappropriate exclusions, despite most avoiding a classic  
16 case-control design (51/53, 96%). Applicability concerns for patient selection were also frequent: 28/53  
17 (53%) studies were judged high concern and only 20/53 (38%) low concern, reflecting that many cohorts  
18 did not clearly match the intended target population or setting.

19 Risk of bias for the index test domain was dominated by unclear judgements, with 43/53 (81%) rated as  
20 unclear. Blinding was rarely documented: index test results were clearly interpreted without knowledge of  
21 the reference standard in only 2/53 (4%) studies, with 12/53 (23%) explicitly unblinded and 39/53 (74%)  
22 unclear. Thresholds for calling metagenomic detections were reported as pre-specified in 37/53 (70%)  
23 studies, but remained unclear in 16/53 (30%). In contrast, concerns about applicability of the index test  
24 were generally low: 51/53 (96%) studies were judged low concern and only 1/53 (2%) high concern, with  
25 1/53 (2%) unclear, indicating that the way respiratory metagenomics was performed and interpreted  
26 usually aligned with the review question.

27 The reference-standard domain showed the most consistent problems. Fifty-two of 53 (98%) studies were  
28 judged at high risk of bias and the remaining one was unclear; none were rated low risk. In most cohorts,  
29 the reference standard consisted of heterogeneous composite criteria, typically combining routine  
30 microbiology (culture ± targeted PCR) with post-hoc clinical adjudication. This likely reflects the difficulty  
31 with diagnosing respiratory infection, especially in critically ill patients. Adjudication panels or treating  
32 teams were frequently aware of the metagenomic findings, so the index test contributed directly to the  
33 final classification of infection versus colonisation or contamination, introducing incorporation and  
34 diagnostic review bias. Verification was also non-uniform: not all participants received the same set of  
35 reference tests, and fungal or viral investigations were often ordered selectively according to clinical  
36 suspicion. Only 2/53 (4%) studies were judged to use a reference standard likely to correctly classify the  
37 target condition, whereas 37/53 (70%) were judged “No” and 14/53 (26%) “Unclear”. Timing and sample  
38 type for reference tests commonly differed from those used for metagenomics (for example, sputum  
39 versus BAL or investigations performed days apart), making discrepancies difficult to interpret. Blinding  
40 was again uncommon: reference standard results were interpreted without knowledge of the  
41 metagenomic result in only 4/53 (8%) studies, with 44/53 (83%) explicitly unblinded and 5/53 (9%) unclear.  
42 Applicability concerns for the reference standard mirrored this pattern: 49/53 (92%) studies were judged  
43 high concern and only 2/53 (4%) low concern, with 2/53 (4%) unclear, reflecting that many truth sets  
44 focused on bacterial culture in selected populations, used non-standard or incomplete testing for viruses  
45 and fungi, and relied on locally defined adjudication criteria that do not fully align with our review question  
46 on pan-microbial, clinically significant respiratory infection.

47 Flow and timing were comparatively better reported. Thirty-three of 53 (62%) studies were judged at low  
48 risk of bias in this domain, 5/53 (9%) high risk, and 15/53 (28%) unclear. Most studies had an appropriate  
49 interval between metagenomic testing and the reference standard (48/53, 91%) and included all patients  
50 in the analysis (47/53, 89%). However, not all patients consistently received a reference standard (7/53,  
51 13%), and 17/53 (32%) studies used different reference standards within the same cohort, contributing to  
52 high or unclear risk of bias for flow and timing in a substantial minority of studies.

53

54 Supplementary Figure 1: Risk of bias and applicability across QUADAS-2 domains.

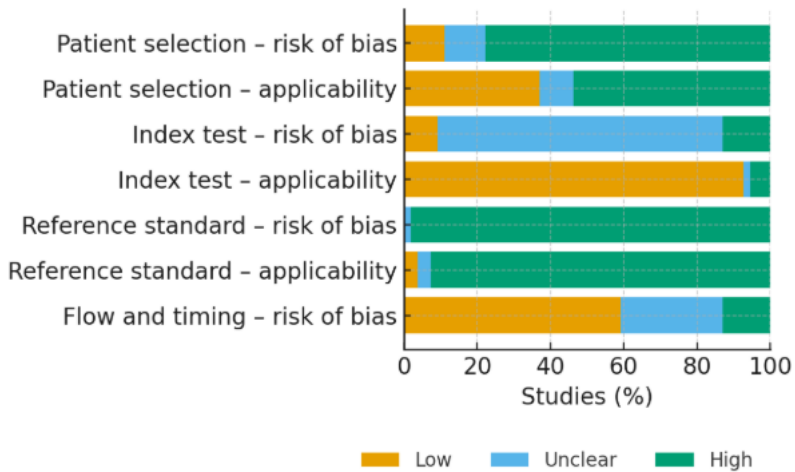

55

## 56 References

- 57 1. Jin X, Li J, Shao M, Lv X, Ji N, Zhu Y, et al. Improving Suspected Pulmonary Infection Diagnosis by  
58 Bronchoalveolar Lavage Fluid Metagenomic Next-Generation Sequencing: a Multicenter Retrospective  
59 Study. *Microbiol Spectr. American Society for Microbiology*; 2022;10.  
60 <https://doi.org/10.1128/spectrum.02473-21>
- 61 2. Xie F, Duan Z, Zeng W, Xie S, Xie M, Fu H, et al. Clinical metagenomics assessments improve diagnosis  
62 and outcomes in community-acquired pneumonia. *BMC Infect Dis. BioMed Central Ltd*; 2021;21.  
63 <https://doi.org/10.1186/s12879-021-06039-1>
- 64 3. Liu Y, Zhang R, Yao B, Yang J, Ge H, Zheng S, et al. Metagenomics next-generation sequencing provides  
65 insights into the causative pathogens from critically ill patients with pneumonia and improves treatment  
66 strategies. *Front Cell Infect Microbiol. Frontiers Media S.A.*; 2023;12.  
67 <https://doi.org/10.3389/fcimb.2022.1094518>
- 68 4. Charalampous T, Alcolea-Medina A, Snell LB, Williams TGS, Batra R, Alder C, et al. Evaluating the  
69 potential for respiratory metagenomics to improve treatment of secondary infection and detection of  
70 nosocomial transmission on expanded COVID-19 intensive care units. *Genome Med.* 2021;13:182.  
71 <https://doi.org/10.1186/s13073-021-00991-y>
- 72 5. Zhang P, Chen Y, Li S, Li C, Zhang S, Zheng W, et al. Metagenomic next-generation sequencing for the  
73 clinical diagnosis and prognosis of acute respiratory distress syndrome caused by severe pneumonia: A  
74 retrospective study. *PeerJ. PeerJ Inc.*; 2020;8. <https://doi.org/10.7717/peerj.9623>
- 75 6. Yang F, Li J, Qi B, Zou L, Shi Z, Lei Y, et al. Clinical Symptoms and Outcomes of Severe Pneumonia Caused  
76 by *Chlamydia psittaci* in Southwest China. *Front Cell Infect Microbiol. Frontiers Media S.A.*; 2022;11.  
77 <https://doi.org/10.3389/fcimb.2021.727594>
- 78 7. Li X, Xiao T, Hu P, Yan K, Wu J, Tu X, et al. Clinical, radiological and pathological characteristics of  
79 moderate to fulminant psittacosis pneumonia. *PLoS One. Public Library of Science*; 2022;17.  
80 <https://doi.org/10.1371/journal.pone.0270896>
- 81 8. Tang X, Wang N, Liu G, Tan H, Li AM, Gao YQ, et al. Psittacosis caused severe community-acquired  
82 pneumonia accompanied by acute hypoxic respiratory failure: a multicenter retrospective cohort study  
83 from China. *BMC Infect Dis. BioMed Central Ltd*; 2023;23. <https://doi.org/10.1186/s12879-023-08283-z>
- 84 9. Zhan Y, Xu T, He F, Guan WJ, Li Z, Li S, et al. Clinical Evaluation of a Metagenomics-Based Assay for  
85 Pneumonia Management. *Front Microbiol. Frontiers Media S.A.*; 2021;12.  
86 <https://doi.org/10.3389/fmicb.2021.751073>
- 87 10. Chen L, Zhao Y, Wei J, Huang W, Ma Y, Yang X, et al. Metagenomic Next-Generation Sequencing for the  
88 Diagnosis of Neonatal Infectious Diseases. *Microbiol Spectr. American Society for Microbiology*; 2022;10.  
89 <https://doi.org/10.1128/spectrum.01195-22>
- 90 11. Yin Q, Li Y, Pan H, Hui T, Yu Z, Wu H, et al. Atypical pneumonia caused by *Chlamydia psittaci* during the  
91 COVID-19 pandemic. *International Journal of Infectious Diseases. Elsevier B.V.*; 2022;122:622–7.  
92 <https://doi.org/10.1016/j.ijid.2022.07.027>
- 93 12. Hao J, Li W, Wang Y, Zhao J, Chen Y. Clinical utility of metagenomic next-generation sequencing in  
94 pathogen detection for lower respiratory tract infections and impact on clinical outcomes in southernmost

- 95 China. *Front Cell Infect Microbiol. Frontiers Media SA*; 2023;13.  
96 <https://doi.org/10.3389/fcimb.2023.1271952>
- 97 13. Wang JZ, Yuan D, Yang XH, Sun CH, Hou LL, Zhang Y, et al. Etiology of lower respiratory tract in  
98 pneumonia based on metagenomic next-generation sequencing: a retrospective study. *Front Cell Infect*  
99 *Microbiol. Frontiers Media SA*; 2023;13. <https://doi.org/10.3389/fcimb.2023.1291980>
- 100 14. Liang M, Fan Y, Zhang D, Yang L, Wang X, Wang S, et al. Metagenomic next-generation sequencing for  
101 accurate diagnosis and management of lower respiratory tract infections. *Int J Infect Dis.* 2022;122:921–9.  
102 <https://doi.org/10.1016/j.ijid.2022.07.060>
- 103 15. Li H, Hao B, Wang Y, Yu D, Chen Z, Du D, et al. Metagenomic next-generation sequencing for the  
104 diagnosis of *Chlamydia psittaci* pneumonia. *Clinical Respiratory Journal. John Wiley and Sons Inc*;  
105 2022;16:513–21. <https://doi.org/10.1111/crj.13519>
- 106 16. Zhao H, Zhao Y, Yan N, Wang Y, Li W, Zhao J, et al. Metagenomic next-generation sequencing of  
107 bronchoalveolar lavage fluid in non-severe and severe pneumonia patients. *J Microbiol Methods. Elsevier*  
108 *B.V.*; 2023;215. <https://doi.org/10.1016/j.mimet.2023.106848>
- 109 17. Li N, Ma X, Zhou J, Deng J, Gu C, Fei C, et al. Clinical application of metagenomic next-generation  
110 sequencing technology in the diagnosis and treatment of pulmonary infection pathogens: A prospective  
111 single-center study of 138 patients. *J Clin Lab Anal. John Wiley and Sons Inc*; 2022;36.  
112 <https://doi.org/10.1002/jcla.24498>
- 113 18. Zhao D, Guo L, Lian D, Gu Y, Yan X, Hu H, et al. Diagnostic Value and Clinical Application of mNGS for  
114 Post-Liver Transplantation Infection: A Cross-Sectional Study With Case Reports. *Front Microbiol. Frontiers*  
115 *Media S.A.*; 2022;13. <https://doi.org/10.3389/fmicb.2022.919363>
- 116 19. Lv T, Zhao Q, Liu J, Wang S, Wu W, Miao L, et al. Utilizing metagenomic next-generation sequencing for  
117 pathogen detection and diagnosis in lower respiratory tract infections in real-world clinical practice.  
118 *Infection. Springer Science and Business Media Deutschland GmbH*; 2024;52:625–36.  
119 <https://doi.org/10.1007/s15010-024-02185-1>
- 120 20. Zhang Z, Liu T, Ming M, Shen M, Zhang Y, Chen H, et al. Metagenomic next-generation sequencing  
121 promotes diagnosis and treatment of *Pneumocystis jirovecii* pneumonia in non-HIV infected children: a  
122 retrospective study. *BMC Pulm Med. BioMed Central Ltd*; 2024;24. [https://doi.org/10.1186/s12890-024-](https://doi.org/10.1186/s12890-024-03135-1)  
123 [03135-1](https://doi.org/10.1186/s12890-024-03135-1)
- 124 21. Zhang B, Gui R, Wang Q, Jiao X, Li Z, Wang J, et al. Comparing the application of mNGS after combined  
125 pneumonia in hematologic patients receiving hematopoietic stem cell transplantation and chemotherapy:  
126 A retrospective analysis. *Front Cell Infect Microbiol. Frontiers Media S.A.*; 2022;12.  
127 <https://doi.org/10.3389/fcimb.2022.969126>
- 128 22. Chen X, Ding S, Lei C, Qin J, Guo T, Yang D, et al. Blood and Bronchoalveolar Lavage Fluid Metagenomic  
129 Next-Generation Sequencing in Pneumonia. *Canadian Journal of Infectious Diseases and Medical*  
130 *Microbiology. Hindawi Limited*; 2020;2020. <https://doi.org/10.1155/2020/6839103>
- 131 23. Bao S, Song H, Chen Y, Zhong C, Tang H. Metagenomic next-generation sequencing for the diagnosis of  
132 pulmonary aspergillosis in non-neutropenic patients: a retrospective study. *Front Cell Infect Microbiol.*  
133 *Frontiers Media S.A.*; 2022;12. <https://doi.org/10.3389/fcimb.2022.925982>

- 134 24. Deng Z, Tang Y, Tu Y, Liu M, Cheng Q, Zhang J, et al. BALF metagenomic next-generation sequencing  
135 analysis in hematological malignancy patients with suspected pulmonary infection: clinical significance of  
136 negative results. *Front Med (Lausanne)*. *Frontiers Media SA*; 2023;10.  
137 <https://doi.org/10.3389/fmed.2023.1195629>
- 138 25. Wang D, Wang W, Ding Y, Tang M, Zhang L, Chen J, et al. Metagenomic Next-Generation Sequencing  
139 Successfully Detects Pulmonary Infectious Pathogens in Children With Hematologic Malignancy. *Front Cell*  
140 *Infect Microbiol*. *Frontiers Media S.A.*; 2022;12. <https://doi.org/10.3389/fcimb.2022.899028>
- 141 26. Wang L, Zha P, Wang Y, Kong Y, Su Y, Dai L, et al. The Value of Macrogene Second-Generation  
142 Sequencing in the Diagnosis, Guidance of Drug Use, and Efficacy Monitoring of Infectious Pneumonia in  
143 Premature Infants. *Comput Math Methods Med*. *Hindawi Limited*; 2022;2022.  
144 <https://doi.org/10.1155/2022/4398614>
- 145 27. Zhao Z, Song J, Yang C, Yang L, Chen J, Li X, et al. Prevalence of Fungal and Bacterial Co-Infection in  
146 Pulmonary Fungal Infections: A Metagenomic Next Generation Sequencing-Based Study. *Front Cell Infect*  
147 *Microbiol*. *Frontiers Media S.A.*; 2021;11. <https://doi.org/10.3389/fcimb.2021.749905>
- 148 28. Zhou H, Larkin PMK, Zhao D, Ma Q, Yao Y, Wu X, et al. Clinical Impact of Metagenomic Next-Generation  
149 Sequencing of Bronchoalveolar Lavage in the Diagnosis and Management of Pneumonia: A Multicenter  
150 Prospective Observational Study. *Journal of Molecular Diagnostics*. *Elsevier B.V.*; 2021;23:1259–68.  
151 <https://doi.org/10.1016/j.jmoldx.2021.06.007>
- 152 29. Zhao YC, Ding YZ, Zhao X, Fu GW, Huang MJ, Li XX, et al. Role and Clinical Application of Metagenomic  
153 Next-Generation Sequencing in Immunocompromised Patients With Acute Respiratory Failure During  
154 Veno-Venous Extracorporeal Membrane Oxygenation. *Front Cell Infect Microbiol*. *Frontiers Media S.A.*;  
155 2022;12. <https://doi.org/10.3389/fcimb.2022.877205>
- 156 30. Liu M, Zhang H, Li L, Mao J, Li R, Yin J, et al. The etiological diagnostic value of metagenomic next-  
157 generation sequencing in suspected community-acquired pneumonia. *BMC Infect Dis*. *BioMed Central Ltd*;  
158 2024;24. <https://doi.org/10.1186/s12879-024-09507-6>
- 159 31. Yan M, Zou X, Wang Y, Wang C, Wang Y, Liu Z, et al. Impact of Metagenomic Next-Generation  
160 Sequencing of Bronchoalveolar Lavage Fluid on Antimicrobial Stewardship in Patients With Lower  
161 Respiratory Tract Infections: A Retrospective Cohort Study. *Journal of Infectious Diseases*. *Oxford*  
162 *University Press*; 2024;229:223–31. <https://doi.org/10.1093/infdis/jiad296>
- 163 32. Chen H, Huang Q, Wu W, Wang Z, Wang W, Liu Y, et al. Assessment and clinical utility of metagenomic  
164 next-generation sequencing for suspected lower respiratory tract infections. *Eur J Med Res*. *BioMed*  
165 *Central Ltd*; 2024;29. <https://doi.org/10.1186/s40001-024-01806-7>
- 166 33. Wu X, Sun T, He H, Xing L, Cheng Z, Geng S, et al. Effect of Metagenomic Next-Generation Sequencing  
167 on Clinical Outcomes of Patients With Severe Community-Acquired Pneumonia in the ICU: A Multicenter,  
168 Randomized Controlled Trial. *Chest*. *Elsevier Inc.*; 2025;167:362–73.  
169 <https://doi.org/10.1016/j.chest.2024.07.144>
- 170 34. Wang D, Fang S, Hu X, Xu Q, Chu X, Mei X, et al. Metagenomic Next-Generation Sequencing Is Highly  
171 Efficient in Diagnosing *Pneumocystis Jirovecii* Pneumonia in the Immunocompromised Patients. *Front*  
172 *Microbiol*. *Frontiers Media S.A.*; 2022;13. <https://doi.org/10.3389/fmicb.2022.913405>

- 173 35. Sun T, Wu X, Cai Y, Zhai T, Huang L, Zhang Y, et al. Metagenomic Next-Generation Sequencing for  
174 Pathogenic Diagnosis and Antibiotic Management of Severe Community-Acquired Pneumonia in  
175 Immunocompromised Adults. *Front Cell Infect Microbiol. Frontiers Media S.A.*; 2021;11.  
176 <https://doi.org/10.3389/fcimb.2021.661589>
- 177 36. Li XX, Niu CZ, Zhao YC, Fu GW, Zhao H, Huang MJ, et al. Clinical application of metagenomic next-  
178 generation sequencing in non-immunocompromised patients with severe pneumonia supported by veno-  
179 venous extracorporeal membrane oxygenation. *Front Cell Infect Microbiol. Frontiers Media SA*; 2023;13.  
180 <https://doi.org/10.3389/fcimb.2023.1269853>
- 181 37. Li Y, Sun B, Tang X, Liu Y lan, He H yong, Li X yan, et al. Application of metagenomic next-generation  
182 sequencing for bronchoalveolar lavage diagnostics in critically ill patients. *European Journal of Clinical  
183 Microbiology and Infectious Diseases. Springer*; 2020;39:369–74. [https://doi.org/10.1007/s10096-019-  
03734-5](https://doi.org/10.1007/s10096-019-<br/>184 03734-5)
- 185 38. Li S, Qin J, Zhou P, Peng M, Qian J, Cai Y, et al. The clinical significance of in-house metagenomic next-  
186 generation sequencing for bronchoalveolar lavage fluid diagnostics in patients with lower respiratory tract  
187 infections. *Front Cell Infect Microbiol. Frontiers Media S.A.*; 2022;12.  
188 <https://doi.org/10.3389/fcimb.2022.961746>
- 189 39. Zheng Y, Liu W, Xiao T, Chen H, Liu Y. Clinical utility of metagenomic next-generation sequencing on  
190 bronchoalveolar lavage fluid in diagnosis of lower respiratory tract infections. *BMC Pulm Med. BioMed  
191 Central Ltd*; 2024;24. <https://doi.org/10.1186/s12890-024-03237-w>
- 192 40. Charalampous T, Alcolea-Medina A, Snell LB, Alder C, Tan M, Williams TGS, et al. Routine  
193 Metagenomics Service for ICU Patients with Respiratory Infection. *Am J Respir Crit Care Med. American  
194 Thoracic Society*; 2024;209:164–74. <https://doi.org/10.1164/rccm.202305-0901OC>
- 195 41. Zhang H, Shen D, Zhou J, Yang Q, Ying Y, Li N, et al. The Utility of Metagenomic Next-Generation  
196 Sequencing (mNGS) in the Management of Patients with Bronchiectasis: A Single-Center Retrospective  
197 Study of 93 Cases. *Open Forum Infect Dis. Oxford University Press*; 2023;10.  
198 <https://doi.org/10.1093/ofid/ofad425>
- 199 42. Ma W, Zhao Y, Lu X, Zhang L, Ma X, Gao J, et al. Negative results of bronchoalveolar lavage fluid  
200 metagenomic next-generation sequencing in critically ill patients. *Front Cell Infect Microbiol. Frontiers  
201 Media S.A.*; 2022;12. <https://doi.org/10.3389/fcimb.2022.962283>
- 202 43. Chen XH, Zhou SJ, Liu YY, Cao H, Zheng YR, Chen Q. Application value of metagenomics next-generation  
203 sequencing in the diagnosis of respiratory virus infection after congenital heart surgery. *Transl Pediatr.  
204 AME Publishing Company*; 2024;13:260–70. <https://doi.org/10.21037/tp-23-341>
- 205 44. Jing C, Ding Y, Zhou J, Zhang Q, Wang M, Ou Q, et al. Optimizing treatment administration strategies  
206 using negative mNGS results in corticosteroid-sensitive diffuse parenchymal lung diseases. *iScience.  
207 Elsevier Inc.*; 2024;27. <https://doi.org/10.1016/j.isci.2024.110218>
- 208 45. Ju C-R, Lian Q-Y, Guan W-J, Chen A, Zhang J-H, Xu X, et al. Metagenomic Next-Generation Sequencing  
209 for Diagnosing Infections in Lung Transplant Recipients: A Retrospective Study. *Transplant International.  
210 Frontiers Media SA*; 2022;36. <https://doi.org/10.3389/ti.2022.10265>

- 211 46. Luo W, He Y, Xu J, Zhang S, Li C, Lv J, et al. Comparison of Third-Generation Sequencing Technology and  
212 Traditional Microbiological Detection in Pathogen Diagnosis of Lower Respiratory Tract Infection. *Discov*  
213 *Med. Discovery Medicine*; 2023;35:332. <https://doi.org/10.24976/discov.med.202335176.34>
- 214 47. Yao A, Wang J, Xu Q, Shah BK, Sun K, Hu F, et al. Higher diagnostic value of metagenomic next-  
215 generation sequencing in acute infection than chronic infection: a multicenter retrospective study. *Front*  
216 *Microbiol. Frontiers Media SA*; 2024;15. <https://doi.org/10.3389/fmicb.2024.1295184>
- 217 48. Dong Y, Chen Q, Tian B, Li J, Li J, Hu Z. Advancing Microbe Detection for Lower Respiratory Tract  
218 Infection Diagnosis and Management with Metagenomic Next-Generation Sequencing. *Infect Drug Resist.*  
219 *Dove Medical Press Ltd*; 2023;16:677–94. <https://doi.org/10.2147/IDR.S387134>
- 220 49. Zhong S, Yang MH. Value of metagenomic next-generation sequencing in children with hematological  
221 malignancies complicated with infections. *Chinese Journal of Contemporary Pediatrics. Central South*  
222 *University*; 2023;25:718–25. <https://doi.org/10.7499/j.issn.1008-8830.2212059>
- 223 50. Fu Y, Zhu X, Cao P, Shen C, Qian X, Miao H, et al. Metagenomic Next-Generation Sequencing in the  
224 Diagnosis of Infectious Fever During Myelosuppression Among Pediatric Patients with Hematological and  
225 Neoplastic Diseases. *Infect Drug Resist.* 2022;Volume 15:5425–34. <https://doi.org/10.2147/IDR.S379582>
- 226 51. Feng RG, Zhou LY, Dou R, Zhou XY, Wang LR, Han LH, et al. Application of metagenomic next-generation  
227 sequencing of bronchoalveolar lavage fluid in the diagnosis and treatment of refractory pneumonia in  
228 children. *Chinese Journal of Contemporary Pediatrics. Central South University*; 2023;25:1253–8.  
229 <https://doi.org/10.7499/j.issn.1008-8830.2307106>
- 230 52. Luo W, Lin X, Chen Y, Luo W, Zhang H. Metagenomic Next-Generation Sequencing for Accurate  
231 Diagnosis of *Pneumocystis jirovecii* Pneumonia: A Comparative Study with Traditional Methods. *Infect Drug*  
232 *Resist.* 2024;Volume 17:2965–74. <https://doi.org/10.2147/IDR.S459722>
- 233 53. Sun H, Chen R, Li T, Gao J, Gu X, Zhu X, et al. Combination of transbronchial cryobiopsy based clinic-  
234 radiologic-pathologic strategy and metagenomic next-generation sequencing for differential diagnosis of  
235 rapidly progressive diffuse parenchymal lung diseases. *Front Cell Infect Microbiol. Frontiers Media SA*;  
236 2023;13. <https://doi.org/10.3389/fcimb.2023.1204024>

237

238
